# Supplementary material
Source: PubMed Central journal article supplement (PMC1847406)
Supplement: NIHMS19409-supplement-SuppFig1.pdf [file NIHMS19409-supplement-SuppFig1.pdf]

Supplemental Figure 1. Consensus sequences of 23 L1 subfamilies, corresponding to nucleotide positions 5134-6019 of a full-length L1 element.

Note: sequences are shown in fasta format.

>L1CS-1A

```
CTAATATCCAGAATCTACAATGAACTCAAACAAATTTACAAGAAAAAACAACAACCCC
ATCAAAAAGTGGGCGAAGGACATGAACAGACACTTCTCAAAGAAGACATTTATGCAGCC
AAAAAACACATGAAAAAATGCTCATCATCACTGGCCATCAGAGAAATGCAATCAAAACC
ACTATGAGATATCATCTCACACCAGTTAGAATGGCAATCATTAAAAAGTCAGGAAACAAC
AGGTGCTGGAGAGGATGTGGAGAAATAGGAACACTTTTACACTGTTGGTGGGACTGTAAA
CTAGTTCAACCATTTGTGGAAGTCAGTGTGGCGATTCCCTCAGGGATCTAGAGCTAGAAATA
CCATTTGACCCAGCCATCCCATTACTGGGTATATAACCAAATGACTATAAATCATGCTGC
TATAAAGACACATGCACACGTATGTTTATTGCGGCATTATTCACAATAGCAAAGACTTGG
AACCAACCCAAATGTCCAACAATGATAGACTGGATTAAGAAAATGTGGCACATATACACC
ATGGAATACTATGCAGCCATAAAAAATGATGAGTTCATGTCCTTTGTAGGGACATGGATG
AAACTGGAAACCATCATTCTCAGTAAACTATCGCAAGAACAACAAAAACCAAACACCCGCATA
TTCTCACTCATAGGTGGGAATTGAACAATGAGATCACATGGACACAGGAAGGGGAATATC
ACACTCTGGGGACTGTGGTATAGCATTGGGAGATATACCTAATGCTAGATGACGAGTTAG
TGGGTGCAGCGCACCAGCATGGCACATGTATACATATGTAACCTAACCTGCACAATGTGCA
CATGTACCCTAAAACCTTAAAGTAT
```

>L1CS-1B

```
CTAATATCCAGAATCTACAATGAACTCAAACAAATTTACAAGAAAAAACAACAACCCC
ATCAAAAAGTGGGCGAGGGACATGAACAGACACTTCTCAAAGAAGACATTTATGCAGCC
AAAAAACACATGAAAAAATGCTCATCATCACTGGCCATCAGAGAAATGCAATCAAAACC
ACTATGAGATATCATCTCACACCAGTTAGAATGGCAATCATTAAAAAGTCAGGAAACAAC
AGGTGCTGGAGAGGATGTGGAGAAATAGGAACACTTTTACACTGTTGGTGGGACTGTAAA
CTAGTTCAACCATTTGTGGAAGTCAGTGTGGCGATTCCCTCAGGGATCTAGAACTAGAAATA
CCATTTGACCCAGCCATCCCATTACTGGGTATATAACCAAATGACTATAAATCATGCTGC
TATAAAGACACATGCACACGTATGTTTATTGCGGCATTATTCACAATAGCAAAGACTTGG
AACCAACCCAAATGTCCAACAATGATAGACTGGATTAAGAAAATGTGGCACATATACACC
ATGGAATACTATGCAGCCATAAAAAATGATGAGTTCATGTCCTTTGTAGGGACATGGATG
AAACTGGAAACCATCATTCTCAGTAAACTATCGCAAGAACAACAAAAACCAAACACCCGCATA
TTCTCACTCATAGGTGGGAATTGAACAATGAGATCACATGGACACAGGAAGGGGAATATC
ACACTCTGGGGACTGTGGTATAGCATTGGGAGATATACCTAATGCTAGATGACGAGTTAG
TGGGTGCAGCGCACCAGCATGGCACATGTATACATATGTAACCTAACCTGCACAATGTGCA
CATGTACCCTAAAACCTTAAAGTAT
```

>L1CS-2A

```
CTAATATCCAGAATCTACAGTGAACCTCAAACAAATTTACAAGAAAAAACAACAACCCC
ATCAAAAAGTGGGCGAAGGACATGAACAGACACTTCTCAAAGAAGACATTTATGCAGCC
AAAAAACACATGAAAAAATGCTCATCATCACTGGCCATCAGAGAAATGCAATCAAAACC
ACTATGAGATATCATCTCACACCAGTTAGAATGGCAATCATTAAAAAGTCAGGAAACAAC
AGGTGCTGGAGAGGATGTGGAGAAATAGGAACACTTTTACACTGTTGGTGGGACTGTAAA
CTAGTTCAACCATTTGTGGAAGTCAGTGTGGCGATTCCCTCAGGGATCTAGAACTAGAAATA
CCATTTGACCCAGCCATCCCATTACTGGGTATATAACCAAATGACTATAAATCATGCTGC
TATAAAGACACATGCACACGTATGTTTATTGCGGCATTATTCACAATAGCAAAGACTTGG
AACCAACCCAAATGTCCAACAATGATAGACTGGATTAAGAAAATGTGGCACATATACACC
```

ATGGAATACTATGCAGCCATAAAAAATGATGAGTTCATATCCTTTGTAGGGACATGGATG  
AAATTGGAAACCATCATTCTCAGTAAACTATCGCAAGAACAAAAACCAAACACCCGCATA  
TTCTCACTCATAGGTGGGAATTGAACAATGAGATCACATGGACACAGGAAGGGGAATATC  
ACACTCTGGGGACTGTGGTATAGCATTGGGAGATATACCTAATGCTAGATGACGAGTTAG  
TGGGTGCAGCGCACCAGCATGGCACATGTATACATATGTAACCTAACCTGCACAATGTGCA  
CATGTACCCTAAAACCTTAAAGTAT

>L1CS-2B

CTAATATCCAGAATCTACAGTGAACCTCAAACAAATTTACAAGAAAAAAACAAACAACCCC  
ATCAAAAAGTGGGCGAAGGACATGAACAGGCACCTTCTCAAAAAGAAGACATTTATGCAGCC  
AAAAAACACATGAAAAAATGCTCATCATCACTGGCCATCAGAGAAATGCAAAATCAAACCC  
ACTATGAGATATCATCTCACACCAGTTAGAATGGCAATCATTAAAAAGTCAGGAAACAAC  
AGGTGCTGGAGAGGATGTGGAGAAATAGGAACACTTTTACACTGTTGGTGGGACTGTAAA  
CTAGTTCAACCATTTGTGGAAGTCAGTGTGGCGATTCCCTCAGGGATCTAGAACTAGAAATA  
CCATTTGACCCAGCCATCCCATTACTGGGTATATACCCAAATGACTATAAATCATGCTGC  
TATAAAGACACATGCACACGTATGTTTATTGCGGCATTATTACAATAGCAAAGACTTGG  
AACCAACCCAAATGTCCAACAATGATAGACTGGATTAAGAAAAATGTGGCACATATACACC  
ATGGAATACTATGCAGCCATAAAAAATGATGAGTTCATATCCTTTGTAGGGACATGGATG  
AAATTGGAAACCATCATTCTCAGTAAACTATCGCAAGAACAAAAACCAAACACCCGCATA  
TTCTCACTCATAGGTGGGAATTGAACAATGAGATCACATGGACACAGGAAGGGGAATATC  
ATACTCTGGGGACTGTGGTATAGCATTGGGAGATATACCTAATGCTAGATGACGAGTTAG  
TGGGTGCAGCGCACCAGCATGGCACATGTATACATATGTAACCTAACCTGCACAATGTGCA  
CATGTACCCTAAAACCTTAAAGTAT

>L1CS-2C

CTAATATCCAGAATCTACAGTGAACCTCAAACAAATTTACAAGAAAAAAACAAACAACCCC  
ATCAAAAAGTGGGCGAAGGACATGAACAGGCACCTTCTCAAAAAGAAGACATTTATGCAGCC  
AAAAAACACATGAAAAAATGCTCATCATCACTGGCCATCAGAGAAATGCAAAATCAAACCC  
ACTATGAGATATCATCTCACACCAGTTAGAATGGCAATCATTCAAAGTCAGGAAACAAC  
AGGTGCTGGAGAGGATGTGGAGAAATAGGAACACTTTTACACTGTTGGTGGGACTGTAAA  
CTAGTTCAACCATTTGTGGAAGTCAGTGTGGCGATTCCCTCAGGGATCTAGAACTAGAAATA  
CCATTTGACCCAGCCATCCCATTACTGGGTATATACCCAAATGACTATAAATCATGCTGC  
TATAAAGACACATGCACACGTATGTTTATTGCGGCATTATTACAATAGCAAAGACTTGG  
AACCAACCCAAATGTCCAACAATGATAGACTGGATTAAGAAAAATGTGGCACATATACACC  
ATGGAATACTATGCAGCCATAAAAAATGATGAGTTCATATCCTTTGTAGGGACATGGATG  
AAATTGGAAACCATCATTCTCAGTAAACTATCGCAAGAACAAAAACCAAACACCCGCATA  
TTCTCACTCATAGGTGGGAATTGAACAATGAGATCACATGGACACAGGAAGGGGAATATC  
ATACTCTGGGGACTGTGGTATAGCATTGGGAGATATACCTAATGCTAGATGACGAGTTAG  
TGGGTGCAGCGCACCAGCATGGCACATGTATACATATGTAACCTAACCTGCACAATGTGCA  
CATGTACCCTAAAACCTTAAAGTAT

>L1CS-2D

CTAATATCCAGAATCTACAGTGAACCTCAAACAAATTTACAAGAAAAAAACAAACAACCCC  
ATCAAAAAGTGGGCGAAGGACATGAACAGGCACCTTCTCAAAAAGAAGACATTTATGCAGCC  
AAAAAACACATGAAAAAATGCTCATCATCACTGGCCATCAGAGAAATGCAAAATCAAACCC  
ACTATGAGATATCATCTCACCCAGTTAGAATGGCAATCATTAAAAAGTCAGGAAACAAC  
AGGTGCTGGAGAGGATGTGGAGAAATAGGAACACTTTTACACTGTTGGTGGGACTGTAAA  
CTAGTTCAACCATTTGTGGAAGTCAGTGTGGCGATTCCCTCAGGGATCTAGAACTAGAAATA  
CCATTTGACCCAGCCATCCCATTACTGGGTATATACCCAAATGACTATAAATCATGCTGC  
TATAAAGACACATGCACACGTATGTTTATTGCGGCATTATTACAATAGCAAAGACTTGG

AACCAACCCAAATGTCCAACAATGATAGACTGGATTAAGAAAATGTGGCACATATACACC  
ATGGAATACTATGCAGCCATAAAAAATGATGAGTTTCATATCCTTTGTAGGGACATGGATG  
AAATTGGAAACCATCATTCTCAGTAAACTATCGCAAGAACAAAAACCAAACACCCGCATA  
TTCTCACTCATAGGTGGGAATTGAACAATGAGATCACATGGACACAGGAAGGGGAATATC  
ATACTCTGGGGACTGTGGTATAGCATTGGGAGATATACCTAATGCTAGATGACGAGTTAG  
TGGGTGCAGCGCACCAGCATGGCACATGTATACATATGTAACCTAACCTGCACAATGTGCA  
CATGTACCCTAAAACCTTAAAGTAT

>L1HS-Ta1

CTAATATCCAGAATCTACAATGAACTCAAACAAATTTACAAGAAAAAACAAACAACCCC  
ATCAAAAAGTGGGCGAAGGACATGAACAGACACTTCTCAAAAAGAAGACATTTATGCAGCC  
AAAAAACACATGAAGAAATGCTCATCATCACTGGCCATCAGAGAAATGCAAATCAAACC  
ACTATGAGATATCATCTCACACCAGTTAGAATGGCAATCATTAAAAAGTCAGGAAACAAC  
AGGTGCTGGAGAGGATGCGGAGAAATAGGAACACTTTTACACTGTTGGTGGGACTGTAAA  
CTAGTTCAACCATTTGTGGAAGTCAGTGTGGCGATTCTCAGGGATCTAGAACTAGAAATA  
CCATTTGACCCAGCCATCCCATTACTGGGTATATACCCAAATGAGTATAAATCATGCTGC  
TATAAAGACACATGCACACGTATGTTTATTGCGGCACTATTCACAATAGCAAAGACTTGG  
AACCAACCCAAATGTCCAACAATGATAGACTGGATTAAGAAAATGTGGCACATATACACC  
ATGGAATACTATGCAGCCATAAAAAATGATGAGTTTCATATCCTTTGTAGGGACATGGATG  
AAATTGGAAACCATCATTCTCAGTAAACTATCGCAAGAACAAAAACCAAACACCCGCATA  
TTCTCACTCATAGGTGGGAATTGAACAATGAGATCACATGGACACAGGAAGGGGAATATC  
ACACTCTGGGGACTGTGGTATAGCATTGGGAGATATACCTAATGCTAGATGACACATTAG  
TGGGTGCAGCGCACCAGCATGGCACATGTATACATATGTAACCTAACCTGCACAATGTGCA  
CATGTACCCTAAAACCTTAGAGTAT

>L1HS-Ta0

CTAATATCCAGAATCTACAATGAACTCAAACAAATTTACAAGAAAAAACAAACAACCCC  
ATCAAAAAGTGGGCGAAGGACATGAACAGACACTTCTCAAAAAGAAGACATTTATGCAGCC  
AAAAAACACATGAAGAAATGCTCATCATCACTGGCCATCAGAGAAATGCAAATCAAACC  
ACTATGAGATATCATCTCACACCAGTTAGAATGGCAATCATTAAAAAGTCAGGAAACAAC  
AGGTGCTGGAGAGGATGTGGAGAAATAGGAACACTTTTACACTGTTGGTGGGACTGTAAA  
CTAGTTCAACCATTTGTGGAAGTCAGTGTGGCGATTCTCAGGGATCTAGAACTAGAAATA  
CCATTTGACCCAGCCATCCCATTACTGGGTATATACCCAAAGGACTATAAATCATGCTGC  
TATAAAGACACATGCACACGTATGTTTATTGCGGCACTATTCACAATAGCAAAGACTTGG  
AACCAACCCAAATGTCCAACAATGATAGACTGGATTAAGAAAATGTGGCACATATACACC  
ATGGAATACTATGCAGCCATAAAAAATGATGAGTTTCATATCCTTTGTAGGGACATGGATG  
AAATTGGAAACCATCATTCTCAGTAAACTATCGCAAGAACAAAAACCAAACACCCGCATA  
TTCTCACTCATAGGTGGGAATTGAACAATGAGATCACATGGACACAGGAAGGGGAATATC  
ACACTCTGGGGACTGTGGTATAGCATTGGGAGATATACCTAATGCTAGATGACACATTAG  
TGGGTGCAGCGCACCAGCATGGCACATGTATACATATGTAACCTAACCTGCACAATGTGCA  
CATGTACCCTAAAACCTTAGAGTAT

>L1HS-preTa

CTAATATCCAGAATCTACAATGAACTCAAACAAATTTACAAGAAAAAACAAACAACCCC  
ATCAAAAAGTGGGCGAAGGACATGAACAGACACTTCTCAAAAAGAAGACATTTATGCAGCC  
AAAAAACACATGAAGAAATGCTCATCATCACTGGCCATCAGAGAAATGCAAATCAAACC  
ACTATGAGATATCATCTCACACCAGTTAGAATGGCAATCATTAAAAAGTCAGGAAACAAC  
AGGTGCTGGAGAGGATGTGGAGAAATAGGAACACTTTTACACTGTTGGTGGGACTGTAAA  
CTAGTTCAACCATTTGTGGAAGTCAGTGTGGCGATTCTCAGGGATCTAGAACTAGAAATA  
CCATTTGACCCAGCCATCCCATTACTGGGTATATACCCAAAGGACTATAAATCATGCTGC

TATAAAGACACATGCACACGTATGTTTATTGCGGCACTATTCAACAATAGCAAAGACTTGG  
AACCAACCCAAATGTCCAACAATGATAGACTGGATTAAGAAAATGTGGCACATATACACC  
ATGGAATACTATGCAGCCATAAAAAATGATGAGTTTCATGTCCTTTGTAGGGACATGGATG  
AAATTGGAAACCATCATTCTCAGTAAACTATCGCAAGAACAAAAACCAAACACCCGCATA  
TTCTCACTCATAGGTGGGAATTGAACAATGAGATCACATGGACACAGGAAGGGGAATATC  
ACACTCTGGGGACTGTGGTATAGCATTGGGAGATATACCTAATGCTAGATGACACGTTAG  
TGGGTGCAGCGCACCAGCATGGCACATGTATACATATGTAACCTAACCTGCACAATGTGCA  
CATGTACCCTAAAACCTTAGAGTAT

>L1HS-1B

CTAATATCCAGAATCTACAATGAACTCAAACAAATTTACAAGAAAAAACAAACAACCCC  
ATCAAAAAGTGGGCGAAGGACATGAACAGACACTTCTCAAAAGAAGACATTTATGCAGCC  
AAAAAACACATGAAAAAATGCTCATCATCACTGGCCATCAGAGAAATGCAAATCAAACCC  
ACTATGAGATATCATCTCACACCAGTTAGAATGGCAATCATTAAAAAGTCAGGAAACAAC  
AGGTGCTGGAGAGGATGTGGAGAAATAGGAACACTTTTACACTGTTGGTGGGACTGTAAA  
CTAGTTCAACCATTTGTGGAAGTCAGTGTGGCGATTCCCTCAGGGATCTAGAACTAGAAATA  
CCATTTGACCCAGCCATCCCATTACTGGGTATATACCCAAATGACTATAAATCATGCTGC  
TATAAAGACACATGCACACGTATGTTTATTGCGGCATTATTCAACAATAGCAAAGACTTGG  
AACCAACCCAAATGTCCAACAATGATAGACTGGATTAAGAAAATGTGGCACATATACACC  
ATGGAATACTATGCAGCCATAAAAAATGATGAGTTTCATGTCCTTTGTAGGGACATGGATG  
AAATTGGAAACCATCATTCTCAGTAAACTATCGCAAGAACAAAAACCAAACACCCGCATA  
TTCTCACTCATAGGTGGGAATTGAACAATGAGATCACATGGACACAGGAAGGGGAATATC  
ACACTCTGGGGACTGTGGTATAGCATTGGGAGATATACCTAATGCTAGATGACACGTTAG  
TGGGTGCAGCGCACCAGCATGGCACATGTATACATATGTAACCTAACCTGCACAATGTGCA  
CATGTACCCTAAAACCTTAAAGTAT

>L1HS-1A

CTAATATCCAGAATCTACAATGAACTCAAACAAATTTACAAGAAAAAACAAACAACCCC  
ATCAAAAAGTGGGCGAAGGACATGAACAGACACTTCTCAAAAGAAGACATTTATGCAGCC  
AAAAAACACATGAAAAAATGCTCATCATCACTGGCCATCAGAGAAATGCAAATCAAACCC  
ACTATGAGATATCATCTCACACCAGTTAGAATGGCAATCATTAAAAAGTCAGGAAACAAC  
AGGTGCTGGAGAGGATGTGGAGAAATAGGAACACTTTTACACTGTTGGTGGGACTGTAAA  
CTAGTTCAACCATTTGTGGAAGTCAGTGTGGCGATTCCCTCAGGGATCTAGAACTAGAAATA  
CCATTTGACCCAGCCATCCCATTACTGGGTATATACCCAAATGACTATAAATCATGCTGC  
TATAAAGACACATGCACACGTATGTTTATTGCGGCATTATTCAACAATAGCAAAGACTTGG  
AACCAACCCAAATGTCCAACAATGATAGACTGGATTAAGAAAATGTGGCACATATACACC  
ATGGAATACTATGCAGCCATAAAAAATGATGAGTTTCATGTCCTTTGTAGGGACATGGATG  
AAATTGGAAACCATCATTCTCAGTAAACTATCGCAAGAACAAAAACCAAACACCCGCATA  
TTCTCACTCATAGGTGGGAATTGAACAATGAGATCACATGGACACAGGAAGGGGAATATC  
ACACTCTGGGGACTGTGGTATAGCATTGGGAGATATACCTAATGCTAGATGACGCGTTAG  
TGGGTGCAGCGCACCAGCATGGCACATGTATACATATGTAACCTAACCTGCACAATGTGCA  
CATGTACCCTAAAACCTTAAAGTAT

>L1PA2-1E

CTAATATCCAGAATCTACAATGAACTCAAACAAATTTACAAGAAAAAACAAACAACCCC  
ATCAAAAAGTGGGCGAAGGACATGAACAGACACTTCTCAAAAGAAGACATTTATGCAGCC  
AAAAAACACATGAAAAAATGCTCATCATCACTGGCCATCAGAGAAATGCAAATCAAACCC  
ACTATGAGATATCATCTCACACCAGTTAGAATGGCAATCATTAAAAAGTCAGGAAACAAC  
AGGTGCTGGAGAGGATGTGGAGAAATAGGAACACTTTTACACTGTTGGTGGGACTGTAAA  
CTAGTTCAACCATTTGTGGAAGTCAGTGTGGCGATTCCCTCAGGGATCTAGAACTAGAAATA

CCATTTGACCCAGCCATCCCATTACTGGGTATATAACCCAAATGACTATAAATCATGCTGC  
TATAAAGACACATGCACACGTATGTTTATTGCGGCATTATTCCACAATAGCAAAGACTTGG  
AACCAACCCAAATGTCCAACAATGATAGACTGGATTAAGAAAATGTGGCACATATACACC  
ATGGAATACTATGCAGCCATAAAAAATGATGAGTTCATGTCTTTGTAGGGACATGGATG  
AAATTGGAAACCATCATTCTCAGTAAACTATCGCAAGAACAAAAACCAAACACCCGCATA  
TTCTCACTCATAGGTGGGAATTGAACAATGAGATCACATGGACACAGGAAGGGGAATATC  
ACACTCTGGGGACTGTGGTATAGCATTGGGAGATATACCTAATGCTAGATGACGAGTTAG  
TGGGTGCAGCGCACCAGCATGGCACATGTATACATATGTAACCTAACCTGCACAATGTGCA  
CATGTACCCTAAAACCTTAAAGTAT

>L1PA2-1Db

CTAATATCCAGAATCTACAATGAACTCAAACAAATTTACAAGAAAAAACAACAACCCC  
ATCAAAAAGTGGGCGAAGGACATGAACAGACACTTCTCAAAAGAAGACATTTATGCAGCC  
AAAAAACACATGAAAAAATGCTCATCATCACTGGCCATCAGAGAAATGCAAATCAAACCC  
ACTATGAGATATCATCTCACACCAGTTAGAATGGCAATCATTAAAAAGTCAGGAAACAAC  
AGGTGCTGGAGAGGATGTGGAGAAATAGGAACACTTTTACACTGTTGGTGGGACTGTAAA  
CTAGTTCAACCATTGTGGAAGTCAGTGTGGCGATTCCCTCAGGGATCTAGAACTAGAAATA  
CCATTTGACCCAGCCATCCCATTACTGGGTATATAACCCAAATGACTATAAATCATGCTGC  
TATAAAGACACATGCACACGTATGTTTATTGCGGCATTATTCCACAATAGCAAAGACTTGG  
AACCAACCCAAATGTCCAACAATGATAGACTGGATTAAGAAAATGTGGCACATATACACC  
ATGGAATACTATGCAGCCATAAAAAATGATGAGTTCATGTCTTTGTAGGGACATGGATG  
AAATTGGAAATCATCATTCTCAGTAAACTATCGCAAGAACAAAAACCAAACACCCGCATA  
TTCTCACTCATAGGTGGGAATTGAACAATGAGATCACATGGACACATGAAGGGGAATATC  
ACACTCTGGGGACTGTGGTATAGCATTGGGAGATATACCTAAGGCTAGATGACGAGTTAG  
TGGGTGCAGCGCACCAGCATGGCACATGTATACATATGTAACCTAACCTGCACAATGTGCA  
CATGTACCCTAAAACCTTAAAGTAT

>L1PA2-1Da

CTAATATCCAGAATCTACAATGAACTCAAACAAATTTACAAGAAAAAACAACAACCCC  
ATCAAAAAGTGGGCGAAGGACATGAACAGACACTTCTCAAAAGAAGACATTTATGCAGCC  
AAAAAACACATGAAAAAATGCTCATCATCACTGGCCATCAGAGAAATGCAAATCAAACCC  
ACTATGAGATATCATCTCACACCAGTTAGAATGGCAATCATTAAAAAGTCAGGAAACAAC  
AGGTGCTGGAGAGGATGTGGAGAAATAGGAACACTTTTACACTGTTGGTGGGACTGTAAA  
CTAGTTCAACCATTGTGGAAGTCAGTGTGGCGATTCCCTCAGGGATCTAGAACTAGAAATA  
CCATTTGACCCAGCCATCCCATTACTGGGTATATAACCCAAAGGACTATAAATCATGCTGC  
TATAAAGACACATGCACACGTATGTTTATTGCGGCATTATTCCACAATAGCAAAGACTTGG  
AACCAACCCAAATGTCCAACAATGATAGACTGGATTAAGAAAATGTGGCACATATACACC  
ATGGAATACTATGCAGCCATAAAAAATGATGAGTTCATGTCTTTGTAGGGACATGGATG  
AAATTGGAAATCATCATTCTCAGTAAACTATCGCAAGAACAAAAACCAAACACCCGCATA  
TTCTCACTCATAGGTGGGAATTGAACAATGAGATCACATGGACACAGGAAGGGGAATATC  
ACACTCTGGGGACTGTGGTATAGCATTGGGAGATATACCTAATGCTAGATGACGAGTTAG  
TGGGTGCAGCGCACCAGCATGGCACATGTATACATATGTAACCTAACCTGCACAATGTGCA  
CATGTACCCTAAAACCTTAAAGTAT

>L1PA2-1D

CTAATATCCAGAATCTACAATGAACTCAAACAAATTTACAAGAAAAAACAACAACCCC  
ATCAAAAAGTGGGCGAAGGACATGAACAGACACTTCTCAAAAGAAGACATTTATGCAGCC  
AAAAAACACATGAAAAAATGCTCATCATCACTGGCCATCAGAGAAATGCAAATCAAACCC  
ACTATGAGATATCATCTCACACCAGTTAGAATGGCAATCATTAAAAAGTCAGGAAACAAC  
AGGTGCTGGAGAGGATGTGGAGAAATAGGAACACTTTTACACTGTTGGTGGGACTGTAAA

CTAGTTCAACCATTTGTGGAAGTCAGTGTGGCGATTCTCAGGGATCTAGAACTAGAAATA  
CCATTTGACCCAGCCATCCCATTACTGGGTATATACCCAAATGACTATAAATCATGCTGC  
TATAAAGACACATGCACACGTATGTTTATTGCGGCATTATTCACAATAGCAAAGACTTGG  
AACCAACCCAAATGTCCAACAATGATAGACTGGATTAAGAAAATGTGGCACATATACACC  
ATGGAATACTATGCAGCCATAAAAAATGATGAGTTTCATGTCCTTTGTAGGGACATGGATG  
AAATTGGAAATCATCATTCTCAGTAAACTATCGCAAGAACAAAAACCAAACACCCGCATA  
TTCTCACTCATAGGTGGGAATTGAACAATGAGATCACATGGACACAGGAAGGGGAATATC  
ACACTCTGGGGACTGTGGTATAGCATTGGGAGATATACCTAATGCTAGATGACGAGTTAG  
TGGGTGCAGCGCACCAGCATGGCACATGTATACATATGTAACCTAACCTGCACAATGTGCA  
CATGTACCCTAAAACCTTAAAGTAT

>L1PA2-1C

CTAATATCCAGAATCTACAATGAACTCAAACAAATTTACAAGAAAAAACAACAACCCC  
ATCAAAAAGTGGGCGAAGGACATGAACAGACACTTCTCAAAAGAAGACATTTATGCAGCC  
AAAAAACACATGAAAAAATGCTCATCATCACTGGCCATCAGAGAAATGCAATCAAACCC  
ACTATGAGATAACCATCTCACACCAGTTAGAATGGCAATCATTAAAAAGTCAGGAAACAAC  
AGGTGCTGGAGAGGATGTGGAGAAATAGGAACACTTTTACACTGTTGGTGGGACTGTAAA  
CTAGTTCAACCATTTGTGGAAGTCAGTGTGGCGATTCTCAGGGATCTAGAACTAGAAATA  
CCATTTGACCCAGCCATCCCATTACTGGGTATATACCCAAATGACTATAAATCATGCTGC  
TATAAAGACACATGCACACGTATGTTTATTGCGGCATTATTCACAATAGCAAAGACTTGG  
AACCAACCCAAATGTCCAACAATGATAGACTGGATTAAGAAAATGTGGCACATATACACC  
ATGGAATACTATGCAGCCATAAAAAATGATGAGTTTCATGTCCTTTGTAGGGACATGGATG  
AAATTGGAAATCATCATTCTCAGTAAACTATCGCAAGAACAAAAACCAAACACCCGCATA  
TTCTCACTCATAGGTGGGAATTGAACAATGAGATCACATGGACACAGGAAGGGGAATATC  
ACACTCTGGGGACTGTGGTATAGCATTGGGAGATATACCTAATGCTAGATGACGAGTTAG  
TGGGTGCAGCGCACCAGCATGGCACATGTATACATATGTAACCTAACCTGCACAATGTGCA  
CATGTACCCTAAAACCTTAAAGTAT

>L1PA2-1B

CTAATATCCAGAATCTACAATGAACTCAAACAAATTTACAAGAAAAAACAACAACCCC  
ATCAAAAAGTGGGCGAAGGACATGAACAGACACTTCTCAAAAGAAGACATTTATGCAGCC  
AAAAAACACATGAAAAAATGCTCATCATCACTGGCCATCAGAGAAATGCAATCAAACCC  
ACAATGAGATAACCATCTCACACCAGTTAGAATGGCAATCATTAAAAAGTCAGGAAACAAC  
AGGTGCTGGAGAGGATGTGGAGAAATAGGAACACTTTTACACTGTTGGTGGGACTGTAAA  
CTAGTTCAACCATTTGTGGAAGTCAGTGTGGCGATTCTCAGGGATCTAGAACTAGAAATA  
CCATTTGACCCAGCCATCCCATTACTGGGTATATACCCAAATGACTATAAATCATGCTGC  
TATAAAGACACATGCACACGTATGTTTATTGCGGCATTATTCACAATAGCAAAGACTTGG  
AACCAACCCAAATGTCCAACAATGATAGACTGGATTAAGAAAATGTGGCACATATACACC  
ATGGAATACTATGCAGCCATAAAAAATGATGAGTTTCATGTCCTTTGTAGGGACATGGATG  
AAATTGGAAATCATCATTCTCAGTAAACTATCGCAAGAACAAAAACCAAACACCCGCATA  
TTCTCACTCATAGGTGGGAATTGAACAATGAGATCACATGGACACAGGAAGGGGAATATC  
ACACTCTGGGGACTGTGGTATAGCATTGGGAGATATACCTAATGCTAGATGACGAGTTAG  
TGGGTGCAGCGCACCAGCATGGCACATGTATACATATGTAACCTAACCTGCACAATGTGCA  
CATGTACCCTAAAACCTTAAAGTAT

>L1PA2-1A

CTAATATCCAGAATCTACAATGAACTCAAACAAATTTACAAGAAAAAACAACAACCCC  
ATCAAAAAGTGGGCGAAGGACATGAACAGACACTTCTCAAAAGAAGACATTTATGCAGCC  
AAAAAACACATGAAAAAATGCTCATCATCACTGGCCATCAGAGAAATGCAATCAAACCC  
ACAATGAGATAACCATCTCACACCAGTTAGAATGGCAATCATTAAAAAGTCAGGAAACAAC

AGGTGCTGGAGAGGATGTGGAGAAATAGGAACACTTTTACACTGTTGGTGGGACTGTAAA  
CTAGTTCAACCATTTGTGGAAGTCAGTGTGGCGATTCCCTCAGGGATCTAGAAGTAGAAATA  
CCATTTGACCCAGCCATCCCATTACTGGGTATATACCCAAAGGACTATAAATCATGCTGC  
TATAAAGACACATGCACACGTATGTTTATTGCGGCATTATTCACAATAGCAAAGACTTGG  
AACCAACCCAAATGTCCAACAATGATAGACTGGATTAAGAAAATGTGGCACATATACACC  
ATGGAATACTATGCAGCCATAAAAAATGATGAGTTCATGTCCTTTGTAGGGACATGGATG  
AAATTGGAAATCATCATTCTCAGTAAACTATCGCAAGAACAAAAACCAAACACCCGCATA  
TTCTCACTCATAGGTGGGAATTGAACAATGAGATCACATGGACACAGGAAGGGGAATATC  
ACACTCTGGGGACTGTGGTATAGCATTGGGAGATATACCTAATGCTAGATGACGAGTTAG  
TGGGTGCAGCGCACCAGCATGGCACATGTATACATATGTAACCTAACCTGCACAATGTGCA  
CATGTACCCTAAAACCTTAAAGTAT

>L1PA3-1Bb

CTAATATCCAGAATCTACAATGAACTCAAACAAATTTACAAGAAAAAACAACAACCCC  
ATCAAAAAGTGGGCGAAGGACATGAACAGACACTTCTCAAAAGAAGACATTTATGCAGCC  
AAAAACACATGAAAAAATGCTCATCATCACTGGCCATCAGAGAAATGCAATCAAAACC  
ACAATGAGATAACCATCTCACACCAGTTAGAATGGCAATCATTAAAAAGTCAGGAAACAAC  
AGGTGCTGGAGAGGATGTGGAGAAATAGGAACACTTTTACACTGTTGGTGGGACTGTAAA  
CTAGTTCAACCATTTGTGGAAGTCAGTGTGGCGATTCCCTCAGGGATCTAGAAGTAGAAATA  
CCATTTGACCCAGCCATCCCATTACTGGGTATATACCCAAAGGACTATAAATCATGCTGC  
TATAAAGACACATGCACACGTATGTTTATTGCGGCATTATTCACAATAGCAAAGACTTGG  
AACCAACCCAAATGTCCAACAATGATAGACTGGATTAAGAAAATGTGGCACATATACACC  
ATGGAATACTATGCAGCCATAAAAAATGATGAGTTCATGTCCTTTGTAGGGACATGGATG  
AAATTGGAAATCATCATTCTCAGTAAACTATCGCAAGAACAAAAACCAAACACCCGCATA  
TTCTCACTCATAGGTGGGAATTGAACAATGAGATCACATGGACACAGGAAGGGGAATATC  
ACACTCTGGGGACTGTTGTATAGCATTGGGAGATATACCTAATGCTAGATGACGAGTTAG  
TGGGTGCAGCGCACCAGCATGGCACATGTATACATATGTAACCTAACCTGCACAATGTGCA  
CATGTACCCTAAAACCTTAAAGTAT

>L1PA3-1Ba

CTAATATCCAGAATCTACAATGAACTCAAACAAATTTACAAGAAAAAACAACAACCCC  
ATCAAAAAGTGGGCGAAGGACATGAACAGACACTTCTCAAAAGAAGACATTTATGCAGCC  
AAAAACACATGAAAAAATGCTCATCATCACTGGCCATCAGAGAAATGCAATCAAAACC  
ACAATGAGATAACCATCTCACACCAGTTAGAATGGCAATCATTAAAAAGTCAGGAAACAAC  
AGGTGCTGGAGAGGATGTGGAGAAATAGGAACACTTTTACACTGTTGGTGGGACTGTAAA  
CTAGTTCAACCATTTGTGGAAGTCAGTGTGGCGATTCCCTCAGGGATCTAGAAGTAGAAATA  
CCATTTGACCCAGCCATCCCATTACTGGGTATATACCCAAAGGACTATAAATCATGCTGC  
TATAAAGACACATGCACACGTATGTTTATTGCGGCATTATTCACAATAGCAAAGACTTGG  
AACCAACCCAAATGTCCAACAATGATAGACTGGATTAAGAAAATGTGGCACATATACACC  
ATGGAATACTATGCAGCCATAAAAAATGATGAGTTCATGTCCTTTGTAGGGACATGGATG  
AAATTGGAAATCATCATTCTCAGTAAACTATCGCAAGAACAAAAACCAAACACCCGCATA  
TTCTCACTCATAGGTGGGAATTGAACAATGAGATCACATGGACACAGGAAGGGGAATATC  
ACACTCTGGGGACTGTTGTATAGCATTGGGAGATATACCTAATGCTAGATGACAAGTTAG  
TGGGTGCAGCGCACCAGCATGGCACATGTATACATATGTAACCTAACCTGCACAATGTGCA  
CATGTACCCTAAAACCTTAAAGTAT

>L1PA3-1B

CTAATATCCAGAATCTACAATGAACTCAAACAAATTTACAAGAAAAAACAACAACCCC  
ATCAAAAAGTGGGCGAAGGACATGAACAGACACTTCTCAAAAGAAGACATTTATGCAGCC  
AAAAACACATGAAAAAATGCTCATCATCACTGGCCATCAGAGAAATGCAATCAAAACC

ACAATGAGATACCATCTCACACCAGTTAGAATGGCAATCATTAAAAAGTCAGGAAACAAC  
AGGTGCTGGAGAGGATGTGGAGAAATAGGAACACTTTTACACTGTTGGTGGGACTGTAAA  
CTAGTTCAACCATTTGTGGAAGTCAGTGTGGCGATTCCCTCAGGGATCTAGAACTAGAAATA  
CCATTTGACCCAGCCATCCCATTACTGGGTATATACCCAAAGGACTATAAATCATGCTGC  
TATAAAGACACATGCACACGTATGTTTATTGCGGCATTATTCACAATAGCAAAGACTTGG  
AACCAACCCAAATGTCCAACAATGATAGACTGGATTAAGAAAATGTGGCACATATACACC  
ATGGAATACTATGCAGCCATAAAAAATGATGAGTTCATGTCTTTGTAGGGACATGGATG  
AAATTGGAAATCATCATTCTCAGTAAACTATCGCAAGAACAAAAACCAAACACCCGCATA  
TTCTCACTCATAGGTGGGAATTGAACAATGAGATCACATGGACACAGGAAGGGGAATATC  
ACACTCTGGGGACTGTTGTATAGCATTGGGAGATATACCTAATGCTAGATGACGAGTTAG  
TGGGTGCAGCGCACCAGCATGGCACATGTATACATATGTAACCTAACCTGCACAATGTGCA  
CATGTACCCTAAAACCTTAAAGTAT

>L1PA3-1Aa

CTAATATCCAGAATCTACAATGAACTCAAACAAATTTACAAGAAAAAAACAAACAACCCC  
ATCAAAAAGTGGGCGAAGGACATGAACAGACACTTCTCAAAAGAAGACATTTATGCAGCC  
AAAAAACACATGAAAAAATGCTCACCATCACTGGCCATCAGAGAAATGCAAATCAAACC  
ACAATGAGATACCATCTCACACCAGTTAGAATGGCAATCATTAAAAAGTCAGGAAACAAC  
AGGTGCTGGAGAGGATGTGGAGAAATAGGAACACTTTTACACTGTTGGTGGGACTGTAAA  
CTAGTTCAACCATTTGTGGAAGTCAGTGTGGCGATTCCCTCAGGGATCTAGAACTAGAAATA  
CCATTTGACCCAGCCATCCCATTACTGGGTATATACCCAAAGGACTATAAATCATGCTGC  
TATAAAGACACATGCACACGTATGTTTATTGCGGCATTATTCACAATAGCAAAGACTTGG  
AACCAACCCAAATGTCCAACAATGATAGACTGGATTAAGAAAATGTGGCACATATACACC  
ATGGAATACTATGCAGCCATAAAAAATGATGAGTTCATGTCTTTGTAGGGACATGGATG  
AAATTGGAAATCATCATTCTCAGTAAACTATCGCAAGAACAAAAACCAAACACCCGCATA  
TTCTCACTCATAGGTGGGAATTGAACAATGAGATCACATGGACACAGGAAGGGGAACATC  
ACACTCTGGGGACTGTTGTATAGCATTGGGAGATATACCTAATGCTAGATGACGAGTTAG  
TGGGTGCAGCACACCAGCATGGCACATGTATACATATGTAACCTAACCTGCACAATGTGCA  
CATGTACCCTAAAACCTTAAAGTAT

>L1PA3-1A

CTAATATCCAGAATCTACAATGAACTCAAACAAATTTACAAGAAAAAAACAAACAACCCC  
ATCAAAAAGTGGGCGAAGGACATGAACAGACACTTCTCAAAAGAAGACATTTATGCAGCC  
AAAAAACACATGAAAAAATGCTCACCATCACTGGCCATCAGAGAAATGCAAATCAAACC  
ACAATGAGATACCATCTCACACCAGTTAGAATGGCAATCATTAAAAAGTCAGGAAACAAC  
AGGTGCTGGAGAGGATGTGGAGAAATAGGAACACTTTTACACTGTTGGTGGGACTGTAAA  
CTAGTTCAACCATTTGTGGAAGTCAGTGTGGCGATTCCCTCAGGGATCTAGAACTAGAAATA  
CCATTTGACCCAGCCATCCCATTACTGGGTATATACCCAAAGGACTATAAATCATGCTGC  
TATAAAGACACATGCACACGTATGTTTATTGCGGCATTATTCACAATAGCAAAGACTTGG  
AACCAACCCAAATGTCCAACAATGATAGACTGGATTAAGAAAATGTGGCACATATACACC  
ATGGAATACTATGCAGCCATAAAAAATGATGAGTTCATGTCTTTGTAGGGACATGGATG  
AAATTGGAAATCATCATTCTCAGTAAACTATCGCAAGAACAAAAACCAAACACCCGCATA  
TTCTCACTCATAGGTGGGAATTGAACAATGAGATCACATGGACACAGGAAGGGGAACATC  
ACACTCTGGGGACTGTTGTATAGCATTGGGAGATATACCTAATGCTAGATGACGAGTTAG  
TGGGTGCAGCGCACCAGCATGGCACATGTATACATATGTAACCTAACCTGCACAATGTGCA  
CATGTACCCTAAAACCTTAAAGTAT
