# Supplementary material
Source: PubMed Central journal article supplement (PMC1847406)
Supplement: NIHMS19409-supplement-SuppTable1.pdf [file NIHMS19409-supplement-SuppTable1.pdf]

**Supplemental Table 1.**

**A) Human-specific primers**

| <b>Name</b> | <b>Forward primer</b>    | <b>Reverse primer</b>       | <b>Internal primer</b>  | <b>A.T. (°C)</b> |
|-------------|--------------------------|-----------------------------|-------------------------|------------------|
| Hsa01_11    | TCCCTGCCTTTTAGGACTCA     | TTTCTTTGTAAGTGGGATGAAGA     | AACCAACCCAAATGTCCAAC    | 60 °C            |
| Hsa01_21    | TTCTGGGAGCCTCAGCTTTA     | TGAACAGTCGCTGTGTTTCA        | CGCAACCTACTCCTCTGACA    | 60 °C            |
| Hsa01_27    | GCAACATGTCTTAGATGAAGCAA  | TTTGTCTTCTCACCAGCAA         |                         | 60 °C            |
| Hsa01_29    | TGCAAAGCAAAAATCCTTGA     | GCAAAGCAAGGCAGGTATGT        | TGCTTTTGGTGTGTTTGGACA   | 60 °C            |
| Hsa01_30    | ATTCCCCTCATCCACCAATA     | GGATATGTGGGGTCGAACTG        | GGGACATGGATGAAATTGGA    | 60 °C            |
| Hsa01_31    | CCATATGTTTGGAGACTGGGAGAG | GCCAGAGTTGTTCCAGAAACCTT     |                         | 55 °C            |
| Hsa01_40    | TTTCTGGGAAGGTCTTGTGTTG   | TAGAGGCTTTTGTGGGCATT        |                         | 60 °C            |
| Hsa01_44    | TTCCACATTGGTCATGGTGA     | CCATCCCTAGAGACCGAACA        | TGACACGTTAGTGGGTGCAG    | 60 °C            |
| Hsa01_60    | CTTGAGCAAAGCAATCCACA     | CCTCCATGCCAGTAGAGAA         |                         | 60 °C            |
| Hsa01_77    | TGCTGGGTTGCCTTTAGTTC     | TCTGAGACTTGGGCTCCACT        |                         | 60 °C            |
| Hsa01_88    | GCAAAAGCAGAATCCAGGTC     | TCATGAAGTAGCCAGGCAGA        |                         | 60 °C            |
| Hsa01_91    | TGGAATAATGGCAAGGAAGC     | CGGGGTAAGGTAGGGTTGTT        |                         | 60 °C            |
| Hsa01_97    | TCTGGGAGCAAACCAAGAGT     | ATTTTCAGCTGATTGGGGTTG       | ACCCATGAGCATGGAATGTT    | 60 °C            |
| Hsa01_98    | AAAGGCCTGGGGAGTTTTTA     | TGCACATTTGTAAGTATTGACC      | ACACTCTGGGGACTGTGGTG    | 60 °C            |
| Hsa01_104   | AGTTCAGCCTTGACAGTCA      | CCTCATCCTCCCTTTCCCTTC       |                         | 60 °C            |
| Hsa01_106   | ATTGCCCATGGACCAGTTAC     | AATGCCTCAAAGGCAGTTCT        | CACAGGAAGGGGAATATCACA   | 60 °C            |
| Hsa01_113   | GCAGGGCTGGGTTCTAAAAT     | TGGGATTGTCCACATCACAC        |                         | 60 °C            |
| Hsa01_117   | AAACCCAGGCAAGGCTATTT     | CCATGAGGTAGGAGGCAAAA        | AGGGACATGGATGAAATTGG    | 60 °C            |
| Hsa01_118   | TTTAGACAAAGCTGCATGAAACC  | GGTTAAGCTTTTAAGCAAGTTGTTATT |                         | 60 °C            |
| Hsa21_1834  | TGTCATGGACTCACCCAAA      | CTGTGAAGTCCCTGGTGGTT        |                         | 60 °C            |
| Hsa21_1837  | TCAGTGAGGAGGCCATTAT      | CTCAAAGCAGTGCACAAA          | CTCAGATGGCAATGCAGAAA    | 60 °C            |
| Hsa21_1839  | CCAAGCAAGAGCTGGAGTTT     | TTTCTCTCCTTTCCCTTGCT        |                         | 60 °C            |
| Hsa21_1840  | CTTGACAGCTGAGAAGCAG      | ACATGGCTTCTCCCTTTTCT        | CATTCTAACCGGTGTGAGATGAT | 60 °C            |
| Hsa21_1841  | AAATCCCCTTCCATACATCTCA   | GAGCAAAGTTGAGAACTCCAA       |                         | 60 °C            |
| Hsa21_1843  | CTGGCTGCATGAATGAAAAA     | CTCGTGACCTCAGGTGATCC        | GGAACAGAACAGAGCCCTCA    | 60 °C            |
| Hsa21_1844  | TCCCACATGTGAGCTTAGGTT    | GAGATGATGGTGTGGGAAATG       | TGACGAGTTAGTGGGTGCAG    | 60 °C            |
| Hsa21_1847  | TGACTGAAGCTCAGTGAATGC    | CCTTGAAGAGGGAAGGTAGGA       |                         | 60 °C            |
| Hsa21_1850  | AAATTCCACATTTTTGCTTCTGA  | AACTTGGCCCCTCAGTCTCT        |                         | 60 °C            |
| Hsa21_1851  | TCCAAAAATTGGGGGAAAA      | AGGGCCTGCTGTTTTATCAC        | CTCAAAGCCGCTCAACTACC    | 60 °C            |
| Hsa21_1852  | GCCTGCAGAGACTGGTAAGG     | CCTGTGAATAAGCTCCAGTGC       |                         | 60 °C            |
| Hsa21_1853  | TGCTTATTTGAAACTGAGCCATA  | GGGTCATGAGCAAATGGAAT        |                         | 60 °C            |

|          |                             |                             |                        |       |
|----------|-----------------------------|-----------------------------|------------------------|-------|
| HS_64    | CCCTAGCTATCAGAAATTTTGACTCTT | TGTTTCCTGCTTGGAAATAAAGG     |                        | 60    |
| HS_740   | TGCTGTCTAGTGTGCAGTGAAA      | AGCTGTTACAATCCAGCCTCAT      |                        | 60    |
| HS_1755  | TCAGGTAATCCCCATATCTGAA      | GATTATGTGCATGCTTCACACC      | GGGTGTCAATTTTGGATCTTTC | 60    |
| HS_1138  | TGAATTTTCTCCAGAGGAGGAG      | GGGCTTCATCTCTTTCCTTTTC      |                        | 60    |
| HS_156   | GTCCAAAATGGAATGCTTTGTC      | TAGGGGCACTAAGCACAGATG       | AAGCTACCAATGCCTTTCTTCA | 60/55 |
| HS_655   | CCATTTTAGTGTACTCAGGAGTGGT   | CGGCAGTGTTTAGATAGTCAGAAAA   | CCAGTTTTTGGCCATTGAGTAT | 55/60 |
| HS_1347  | CTGGTGTGGAAGGCAATTA         | GTCACGGTTGCATTGATTTTAG      |                        | 55    |
| HS_1313  | AGCCTAGAAACTGCTTTATATCCA    | TTCACATGCTGGCTTTTCTTTA      | TCTTTGAAGCATTGTGAATGG  | 60    |
| HS_1592  | CAAATTTCTGGGCTGTCTTCTC      | AAGTGAGGGTCTCATGCATTTT      |                        | 55    |
| L1PA3-1B |                             |                             |                        |       |
| HS_868   | GGCCTTGAGGTAAAATACTCCA      | TTTTGTATTTCCACAGTATCCA      |                        | 55    |
| HS_1214  | GTTTTTAAGGGTGGTGTACTTGGT    | CACAGTTGCAATTCCATTGTTT      |                        | 55    |
| HS_1346  | GCTTACCCTCTCCTGACCCTAT      | CAGGACCACACAAAAACAGCTA      | TGGCTCTCTGTTTGTCTGTTGT | 55/60 |
| HS_1587  | GAGGTCACAGCAGGTACTTAGGA     | AGAGAGCTCTGCAGTAGGCAGT      | GAGTGACCCAATTTTCCAGGT  | 55/62 |
| HS_1841  | AAATCCCCTTCCATACATCTCA      | GAGCAAAGTTGAGAACTCCAA       |                        | 60    |
| HS_213   | TTGGTTCATCCCATATGATGTC      | CACACTGTTAGTTGCCTCATCA      | TGGATCCCTTCCTTACACCTTA | 55    |
| HS_1047  | TCGGGGCTCTTATAACAGATTG      | CGATGATATCAAAGGATGCAGA      |                        | 55    |
| HS_1730  | TCAAAGGATTTGAAAAATATGCT     | TCTTGGTTCAATTTATGCTGTG      | TTGTCAATTTTGGCTTCTGTTG | 55    |
| HS_845   | TGGTTGATGAAGAAAAACCTTG      | CAGGTTATAATGCTGCCCTTTC      | GTTTGATCTCAGACTGCTGTGC | 60/55 |
| HS_880   | TGCTTGCCATCTTATTTTCTCA      | GGGGAAGGTAGAGGTAAATCACT     | GGACATGGATGAAATTGGAAT  | 60    |
| L1PA2-1A |                             |                             |                        |       |
| HS_235   | TGGTAGCTGTGTGTATGGGAAG      | CCTTCTAAAACAGGGCACAATC      |                        | 60    |
| HS_511   | AGTGCCAAATGCCAGTAGAAAT      | GCACCCAGCCTGAAAGTATTTA      | GAACTCCCATTACAAATTGCTT | 60    |
| HS_814   | AGCTCCTACGAAAAGCACAGAG      | GACCACCAGCTGAAGGTGTATT      | CCATTACAAATTGCTTCAAAGA | 60    |
| HS_835   | TGCCTATTCTAATGGGGTATG       | GGCCTGTTTAGCTTTACTGAGG      | ATGAAGCTTAGTTTGGCTGGAT | 55    |
| HS_1362  | TGAAAAGAAAGAGGCATCAACA      | GTCACCTACCTGCATTCTCTC       |                        | 55    |
| HS_1561  | TCCTCTCTCCTTGCATGTATCA      | TAGATGCTGGGTTGTGTGTTAGA     |                        | 55    |
| HS_1637  | AATTTAGAGCTGCAGCATAGCA      | GGTATCCCTGATATCATTCAAGACTTA | CCATTACAAATTGCTTCAAAGA | 60    |
| HS_1317  | CAGCTGGCTGTAAAAACATGAA      | ATCTGTTCAATCCACACGTCTT      | GAGGGAATCCTCCCTAACTCAT | 60    |
| HS_1131  | ACATGTCTGGTCAGTTGGTGTC      | AAGTTTAAACGCACTGTGTTCTC     |                        | 60    |
| HS_1196  | GCAGACATTTCTCAGCTCCATT      | GCCAGCTTTTGGTGAAGAATTA      |                        | 60    |
| L1PA2-1B |                             |                             |                        |       |
| HS_269   | ATGGAGAGAAAAGGTCTGATGG      | GGGAGGTGGTTGTTGTAACTTT      |                        | 55    |
| HS_416   | TGACGTGAACCCACAGATAGAG      | TGAAAGGGGAGAACTTTTGCTA      | TGTGGGATATAGTCTCGTGGTG | 55/60 |
| HS_541   | TTCCAGCCTTTAAGAAAGTGAA      | GCCAACGTCACAGCAAATAAT       |                        | 55    |
| HS_468   | TCAAGAATGCTGAAAAAGAGA       | TGTCTTTTTCATCACAAAATAACCA   |                        | 55    |

|           |                             |                            |                         |       |
|-----------|-----------------------------|----------------------------|-------------------------|-------|
| HS_761    | GAAGAAGGCTGACAGTGGCTAT      | TACAATCTTGGCTGTGTGGAAG     |                         | 60    |
| HS_812    | TACAGAGCAAAGGAATCTGCAA      | TTGGTTAAAATGGTGAAACACG     |                         | 55    |
| HS_921    | TTCTCATTTCAGATGCAAGAACC     | CCAGCTACTGAACGTCATTTCTT    |                         | 60    |
| HS_1004   | CATGATCCCTTTTATGGAGTGC      | TAAATCATTTTGCCTTGCCTTC     | TACCTCAGATGGAAATGCAGAA  | 60    |
| HS_1308   | AACTTAGCTCTTGGGTTTGCTG      | CTAGACTCCCTTCTCAAAGCA      | TGTGGGATATAGTCTCGTGGTG  | 60    |
| L1PA2-1C  |                             |                            |                         |       |
| HS_981    | TGAAAACATGCTGTTCCAACCTT     | TGTTGTTGCAGCTGAAAATGAT     | CAAGTCAATCCTAGGCCAAAAG  | 55/60 |
| HS_205    | GTGTACAATGGAAGGTGCTGAA      | TGAGAAGTGTCTGCTCATGTCC     | GGAGCCTTGTTAGGGCTTTTTTA | 60/55 |
| HS_343    | CCAAATGAACCTCACCTTTCA       | TGAACTCTGTAAGGAATGACTGG    | GCACTCCCTAGTGAGATGAACC  | 60    |
| HS_646    | TTGGCTGCAGATAGCACTTTAC      | CCAGTTATTTCTGCAACGTGT      | AGCTACCAATGCCTTTCTTCAC  | 60    |
| HS_904    | AGTTAGCAAAGATCGCAGGTTC      | CGTGTCTCTTGTGACTGTCTG      | TTGCTGTGCAGAAGCTCTTTAG  | 55/60 |
| HS_1202   | AGCCTCAGCTCTCAGTCACTCT      | TCTCCATTTCTGCAAGTGTGAG     | TCCTTCAGCAAAGTCTCAGGAT  | 60    |
| HS_1485   | ATGCTCCTCTACTGTGGGATGT      | CTTTTCCCCTTTCTGAAAAGTC     | ATTTCTTGAGCAGTGGTTTTGT  | 60    |
| HS_1669   | AAATATGGAGCCAATCACTGGT      | CAGACTAGAGGAAAGGGAGATGAG   |                         | 60    |
| HS_731    | TTTCCCAAAGCCTTAATTTCTG      | TCAAGGCCCTATTTAGAGAAAGAA   |                         | 55    |
| L1PA2-1D  |                             |                            |                         |       |
| HS_664    | TGGGTTGGCACTTTTAGATAACC     | AACAGTCCCTGCAAATTGACTT     |                         | 60    |
| HS_613    | TGGATGTCCATATACAGAGGAATG    | CAGTGCTTTTGAGGTCTTAGCC     | TGGGGTGGAGAGTTCTGTAGAT  | 60    |
| HS_716    | TGCTCTAGGTAGTGTGGGACA       | TTGTAAAGTTAAGCCAAATTGAGG   |                         | 55    |
| HS_989    | TTAAGCAAGTTCAAGGCAGACA      | ACTGAGCATTTCAGGGACTCATT    | GCAGGAAAGATCCAAAATTGAC  | 55    |
| HS_1368   | GGTGTAAAGCCAAAGGATGAAAT     | CCACAGCCTGTTCAATGTTCTA     | AGTGACACGATTTTCCAGGTGT  | 55/60 |
| HS_1428   | TATTTAGTGGCCCAAGAATTGC      | TTTTTCATCATTGACTGGTGTGG    | GTTTGATCTCAGACTGCTGTGC  | 60    |
| L1PA2-1Da |                             |                            |                         |       |
| HS_382    | AACAGTTCTCTTAGACACAGCTGATTA | TGTCTTTATACCTTGGCAGCAT     |                         | 60    |
| HS_988    | TTCTTGGTCTTTTTGTGGGAAT      | ATTTGAAACTCAGGGGAAAGGT     |                         | 60    |
| HS_1690   | GACTGATAAAGCTGCCCTGTTC      | TCAAGTCACTTTCCCTCTAGGC     |                         | 60    |
| HS_1807   | TGGGCTAGCTATAGTGAAAGATGA    | GCAAGTAGAGTCAGCCAGACAG     |                         | 55    |
| HS_484    | TGAATTCTTGCTGACCTCTTCA      | TGTTGACAGTGGGGTGTAAAG      | TGATGGGAAGTGATTGGATCAT  | 55    |
| HS_226    | TGGGCTAGCTATAGTGAAAGATGA    | GCAAGTAGAGTCAGCCAGACAG     |                         | 60    |
| HS_607    | CCTGTAGGACAAACAAACACCA      | TGCATCTGTCTATGTGTAAGAAGAAA | GTTTGATCTCAGACTGCTGTGC  | 55/60 |
| HS_896    | TTTAGCTGGCTTCATCTGCTTT      | CATACATCAAGCCAGAAGGTGA     |                         | 55    |
| HS_526    | CTACCCAGCCTTCTACCTCCTT      | ATCATTTCGAAGAAATGAGAGGA    |                         | 55    |
| L1PA2-1E  |                             |                            |                         |       |
| HS_31     | CCATATGTTTTGAGACTGGGAGAG    | GCCAGAGTTGTTTCAGAAACCTT    |                         | 55    |
| HS_166    | ATATTATGCCATCCCAAGCACT      | GATTGGCAACAACCTAAACTGGA    |                         | 60    |

|         |                             |                             |                          |       |
|---------|-----------------------------|-----------------------------|--------------------------|-------|
| HS_195  | CAATGCACCTGAGCTACTTCTG      | AGAATCAGGGGGCTTTAACATT      |                          | 55    |
| HS_616  | ATTATCTCCATTGGATGAAGTCC     | CATTGTTTTGAAGTCTCAGTATCCA   | AGCTTTGAAGAGAGCAGTGGTT   | 60    |
| HS_771  | CTCCATCTCTCCAATCCTGAAC      | ACCTCTAATAACAAGTTTTCTTTTACA | CTGGAGGCATCACACTACCTG    | 55    |
| HS_847  | GTACAAACCAACCAGATCCTCA      | CTCATTCTCCATACCCACAAT       | CATGCTCATGGGTAGGAAGAAT   | 60    |
| HS_873  | TCTTTCTACGATAAGAATCTATGATGG | TCATTTCATTGCTTTTCATGCTC     | CACTTGATCATGGTGGATAAGC   | 60    |
| HS_1741 | ATTGCACAGGCATAGACTGGT       | TCTCAGGGAAAAAGATTTTACA      | AGCACCTGTTGTTTCTGACTT    | 55/60 |
| HS_1276 | TCCTGCTCATCAATTGTTTGTG      | AAATCCCTTAGAGCTCCTCCTG      | AACATACGTGTGCATGTGTCTTTA | 55/60 |
| L1HS-1A |                             |                             |                          |       |
| HS_398  | CCCTTCTAGGACCACAACACAT      | CTTCCCAGGGTCTGTAATGAAG      | GTTTGATCTCAGACTGCTGTGC   | 60    |
| HS_452  | CCATTTCTCCAAATGAAATAGTCA    | TCCTATTCTGGTCACCTTTTCT      | TGTGGGATATAGTCTCGTGGTG   | 60    |
| HS_529  | GACCCACAACCTACCAAATTAAC     | GCATGAGAGCCAAAATATGAAA      | GCACTCCCTAGTGAGATGAACC   | 60    |
| HS_657  | GTGTTTCTAGTGCCTGGGTAGC      | AGTTAAGATGCAGCTGGGCAAG      | GCACTCCCTAGTGAGATGAACC   | 60    |
| HS_1169 | TGGTGGATGAATTCTAAATGAGC     | TGCAGAGATAACCCTCAAAGG       | TCTAACAGACAGGACCCTCAGC   | 55    |
| HS_1020 | AGAGTTTAGAGTCTGGATTGGAGA    | GAATCCTGCCCTTGTATGTTTA      |                          | 55    |
| L1HS-1B |                             |                             |                          |       |
| HS_623  | CATAGGAGGCCAAAGAAACATC      | GGGGACTGATGCAGAGAACTTA      |                          | 55    |
| HS_341  | CAGTAGAGAAAAATAATTTCCCAAGG  | CACCAAGTGGGTAAATATACCATAAA  |                          | 55    |
| HS_347  | AAGGAATGTGGACGGAAGTG        | CCCAGTTTTTGTGTTGATGCTT      | TGGCTCTCTGTTTGTCTGTTGT   | 55/60 |
| HS_911  | AATTTTGTGAGAATTCAGTCTCT     | GCCTAAAAATCCATGAAAGATGA     | AGTAACCAAACAGCATGGTACTG  | 60    |
| HS_1251 | TTGGAAGCTGAAAAAGAAGCTA      | TGCATTGTCTCTAACCCATTTT      |                          | 60    |

## B) Chimpanzee-specific primers

| Name     | Forward primer           | Reverse primer          | Internal primer      | A.T. (°C) |
|----------|--------------------------|-------------------------|----------------------|-----------|
| Ptr01_02 | TATGGATCACAGTGTGGGGTA    | ATAGCATGTCCCATCCATT     |                      | 60 °C     |
| Ptr01_10 | TTACCTTCTCCAAGGCCAGA     | GGAGCTCCTAAAACCCAAGC    |                      | 60 °C     |
| Ptr01_13 | ATTTCCCTCAGGCACCTAT      | CCTGGATGGTCAGGTGATTT    | TGACGAGTTAGTGGGTGCAG | 60 °C     |
| Ptr01_18 | GATTCTGCATATTTCTTCATGCAC | TGTTGTGTTTAAGGGCTTTGTG  |                      | 60 °C     |
| Ptr01_26 | CAGCGGTGATTCTCATCTCA     | TAGGCAAGGACAAGGCATCT    |                      | 60 °C     |
| Ptr01_33 | TCAGGCTAGCTGATCCAAAA     | TGCTAAGAAAGTTGCTCCTCAA  |                      | 60 °C     |
| Ptr01_35 | AGCTCCAGGCTATGGCAGTA     | CTTCTGTTTTTGGAAATGTCAGC |                      | 60 °C     |
| Ptr01_36 | AGCCCTAAGATGTGCTTTGC     | CAGGTGCCCTTCTCATAGA     |                      | 60 °C     |
| Ptr01_40 | AAGGCAGATGTGGTGTAGGG     | ACTACCTGGAGTTGCCATGC    |                      | 60 °C     |
| Ptr01_43 | TTGGAAGGCTAATGTGTCAGA    | AAGGATTTAAACAGTCCGCCTA  |                      | 60 °C     |
| Ptr01_48 | GTTGTTGCTCAGGCAGCTAA     | CAGGTTTGCATGTATGGTTCA   |                      | 60 °C     |
| Ptr01_53 | TTGCAACAACTGGCAATTC      | TTTGTCCAAAGTGCCTAGCAT   | TGACGAGTTAGTGGGTGCAG | 60 °C     |

|            |                             |                             |                         |       |
|------------|-----------------------------|-----------------------------|-------------------------|-------|
| Ptr01_55   | GCCTAACAAATTGGCGATCTT       | GAGAAACCAATGCATGACGA        |                         | 60 °C |
| Ptr01_66   | GGGAGTGGTGACTGTTTTTCTC      | ACTCCTAGGAAAAAGCCGAAGT      | TCACCCCTTTCTTTGACTCG    | 60 °C |
| Ptr01_71   | TGAATTCAGAAGGGGTTGCT        | CAGTTAGGCCAGGTGAGAGG        |                         | 60 °C |
| Ptr01_75   | AAACGTTGCACTGCCATTTA        | TGTGGTGAATTGAATACGC         |                         | 60 °C |
| Ptr01_81   | TTGCTCCTGTCTTTTGTGGT        | AGAAAGAGCTGGCTGTTCAA        | TGTGCACATGTACCCTAAAACCT | 60 °C |
| Ptr01_88   | AGGTGGCGTCACAGACCTAT        | GATGAGGGGAAAACAGTGGA        |                         | 60 °C |
| Ptr01_89   | GAGACAAGGAGGGCAAAGGT        | TTTTTCTCCTAACTGGGCTGT       |                         | 60 °C |
| Ptr01_91   | TAAAGGGAAGCCTGAGGACA        | AGGCTTTGACAGGTGCTCTG        |                         | 60 °C |
| Ptr22_1148 | TCAACATCAACTTTATTTACACAGTCA | TGCAGCTTTGGATTCAATTGT       | TATGGCCGCATAGTATTCCA    | 59 °C |
| Ptr22_1152 | GCATGGGAATATGGCATCTG        | CTCCTCTGTCTGCCAGAACC        |                         | 60 °C |
| Ptr22_1153 | TCACATTTCTCTCAAGCATGAAC     | GCAGGTGGGTATTGTTTCAGTA      |                         | 60 °C |
| Ptr22_1154 | CCTGTCCTTTAAGAAAAAGGCTA     | CTTTAGATCTGTGAACCACACTTG    |                         | 58 °C |
| Ptr22_1155 | CAGCCCCATATGCTTTGTTT        | CACTTCTACCTTGGGTCTCTCA      | AGTCAGTGTGGCGATTCTCTC   | 60 °C |
| Ptr22_1156 | GCACAAGGCCATTCTTATG         | GAGAAGCAGGAAGCAGCAAG        | TGACGAGTTAGTGGGTGCAG    | 60 °C |
| Ptr22_1159 | ATGGAAATTTTCAGCTTCAATGC     | CCAGTATTTTTGGTCTGCTTCC      |                         | 60 °C |
| Ptr22_1159 | CAGATAGAAAAGCAAAAGAACACA    | TTCCTGTCCTCTGTCAACACC       | TTGTGAATAATGCCGCAATAAA  | 59 °C |
| Ptr22_1160 | ACGTGCACACACACACACAC        | GATGGAATGGTTGTTCCATGT       | TGTGGCACTATTCACAATAGCA  | 60 °C |
| Ptr22_1161 | CACAGCTGGAGGAGGTAGAAAG      | AGAACAGCTGAGGGAAAACCTTG     |                         | 60 °C |
| Ptr22_1162 | TGCCATAAGGCTTGGTATG         | ATTCTCAGTTTGGCCAAGGA        | TGAGAATATGCGGTGTTTTGG   | 60 °C |
| <hr/>      |                             |                             |                         |       |
| L1PA3-1A   |                             |                             |                         |       |
| CS_190     | GACAGTGCTGAGATGGAGAAGA      | AACTAAAGTTTGTTCGGGGTTG      | AACTAAAGTTTGTTCGGGGTTG  | 55/60 |
| CS_345     | TGGAAGCACCACAATTATATGG      | GAGAAACAGTTCTTCCTGCACA      |                         | 55    |
| CS_778     | GTGCAGTTCAAAGAATCTCAGG      | TGGCCTAACAAACATTTTAAAAGATAA |                         | 55    |
| CS_401     | GCAATTCAGAGGACATATGAGG      | CACTGTTGCAATCTACCTCCAG      | GGGATCCAGTTTCAGCTTTCTA  | 60    |
| CS_650     | ACCCTACCCAGATTTTCAGGAT      | GTTGCAGGGTAGAAACAAAGGT      |                         | 55    |
| CS_572     | TAAGCAGGAGGTAGGTGAGAGC      | TAAATCTCACTCAGAAAAGCATGG    |                         | 60    |
| CS_1       | TTTGCTAAATTTTCATGACTAGGCTAA | TGAGAGAGAAAAGGCTATTTGCTT    | CCATTGCTTTTGGTGTTTTAGA  | 60    |
| L1PA3-1B   |                             |                             |                         |       |
| CS_438     | TGGTAATACTCAAGTTTCAGTCCAA   | GCCCTGTCATCTTGTGACATT       | GACACGTGCACACGTATGTT    | 60    |
| CS_644     | TGAGGACAATTTTCAAAGCACT      | GAAGCAAAGTTAATTGTGGAACC     |                         | 60    |
| CS_859     | TCAACAAGTTGAGCAAGATCGTA     | CAGCATTTTACTGTGTTTCAGCA     | GTTAGTAGCTTGATGGGGATGG  | 55    |
| CS_327     | CAGCAGGTGGAGCTGTTTCTA       | GATATATTTGAAAAGGGCCTTCC     |                         | 60    |
| L1PA2-1A   |                             |                             |                         |       |
| CS_195     | TTCCTGCTCTGTTTGTCTATTCA     | AATAATTCATCCGGTCTTCAGG      |                         | 55    |
| CS_201     | GCTTTGTTTTTCAAGCATGTCC      | TTATCCCCTTCCATTAATCACA      | TCTGGCTGCATAAATGTCTTCT  | 55/60 |

|          |                             |                              |                          |       |
|----------|-----------------------------|------------------------------|--------------------------|-------|
| CS_216   | GGCAGTTCTCTATATTTCCACATTT   | CAGGCAAATCAGTGTGAATCAT       |                          | 60    |
| CS_917   | TACTGAAGCTGTCTCTCTCTCC      | TGCATATCATTGCTCTTGCTTT       |                          | 55    |
| CS_1078  | CCACACAGAAATACACTGCACA      | TTTGCCAGTACTTACAGATGG        |                          | 60    |
| CS_1093  | CATGTAGCTTGGGCATTGAGTA      | CCTCTGGGAGTTTGAAAGACAG       | AATACTGGCAAACGAATCCAG    | 60    |
| CS_727   | CTATTGGCAAAGCCAAACAGA       | TGGCCTCTGTACACATTTTAC        | GAAGGGGAATATCACACTCTGC   | 60/55 |
| CS_943   | GGTTCTGGCGTAGAGTAAGGTC      | TTGCTTATCCTTGTACCACAG        |                          | 55    |
| L1PA2-1B |                             |                              |                          |       |
| CS_366   | TGGCTGGATTCAATCAAATTTAC     | TCTCATGGCCATTGAAAATTC        | TGCTGAGGAGAGCTTTACTTCC   | 60    |
| CS_783   | GGACAAGAATCTGAGACCATACTTT   | TTATACTTGGTGGCTTCTTGTG       | GTTGGAGTTCATTGTAGATTCTGG | 60    |
| CS_789   | TTGACTGTATATCTTTCCAGGATTTG  | GGAAACAGATACGGGGATAAAA       | TGAGTGAACCTCCATTCCAAAT   | 55/60 |
| CS_801   | TTCTTGTTTTCTCCTCTGAAGCA     | TAAATTCAGGCCCATAAATCA        | TTGGCTCTGTTTTATATGCTGGA  | 55    |
| CS_1056  | ACTAGCACATGGGAAAGGTGAT      | CATAGGAACTGTGTAACCAAAGG      | TCCAGAATCTACAATGAACTCCAA | 55/60 |
| CS_207   | TTTCTCCCCGTAATGTTTCAGTT     | TCAAATCCCAAAGTGACAAAA        |                          | 55    |
| CS_458   | AAGCACAAATTCAGAAGCACAA      | GCTTCATTACACAAACCATTT        |                          | 55    |
| CS_1033  | GCACTGTGATAGAATGCAAGGA      | TGTTCAAACCTGCCTCAACTCAT      |                          | 55    |
| L1PA2-1C |                             |                              |                          | 60    |
| CS_1014  | ATCAAAGGGACCTGTAAGACGA      | AAATAATGATCCCAAGCCCTCT       |                          | 60    |
| CS_961   | CTTGTGCCCTAATTCTTTGACC      | AAGTAAGCTCACCTGGAACAGC       |                          | 55    |
| CS_119   | TTTCTGCCTTATGTTTTGGGTA      | TTCCCTATTTTTCCATCGATCT       |                          |       |
| L1PA2-1D |                             |                              |                          |       |
| CS_168   | GAAAAGTCTTGCTCCCTTCTGA      | TGCAGGTATAGCAAAGAAAATCA      | AACAGAGCCCTCAGAAATAACG   | 55/60 |
| CS_800   | TGTCTCAAAGGTAGCATTTTTCA     | TCAGTCCATGTTTCCAATTCAG       | CTAGTTTACAGTCCCACCAACAGT | 55/60 |
| CS_1024  | TTCAAAGATAAGCACCGAAGA       | ACATGGGTACATGGGTGTCTTT       |                          | 55    |
| CS_66    | GGGAGTGGTACTGTTTTTCTC       | ACTCCTAGGAAAAAGCCGAAGT       | TCACCCCTTTCTTTGACTCG     | 60    |
| L1PA2-1E |                             |                              |                          |       |
| CS_156   | TCCTCTAATCTGTGGAGATATGAAA   | GGCACCAATTTTTCTTCAGC         |                          | 55    |
| CS_283   | GAGGGTGATGAAATTATAGATAAGTGA | GGTGGTTTTGTTTGTGTGTG         |                          | 60    |
| CS_798   | GAGCTCCCTCCCCAGTAAAA        | CACACCCCTGGTAACTGCTT         |                          | 60    |
| CS_963   | CCCTTTCCCAAATAAGACA         | TTGTTTTTCTGGCTTCAGCA         |                          | 55    |
| CS_1109  | GAAGGGCAAGGTTGACAAGA        | GAACATGTGGCCATTCACTG         |                          | 55    |
| CS_118   | TTGCAAGAAGAGAAAATAAACTTGAA  | GGGAAGTTGGCCTAAAGGAG         |                          | 55    |
| CS_344   | TGAAACTTTTGACAGCATGTAGA     | CATTTACCTCTCTCCGTTTG         | AACAGGTGCTGGAGAGGATG     | 55/60 |
| CS_442   | TGCATACACCAAGTGATCTGG       | AACATCTAAAAAGCATACAACCTGAAAA |                          | 60    |
| CS_230   | GGCCCCGTGGAATATAACTT        | CACAGACAGCCTAGGCACAG         | CCCACAAGAGAAAGCAGGAA     | 60    |
| CS_389   | AGTTCCCCAACACCTGGAAT        | TGATTTTCTGCTTTTATTTTAGGTTCA  | AACAAAGCTGGAGGCATCAC     | 55/60 |

|                |                            |                            |                         |       |
|----------------|----------------------------|----------------------------|-------------------------|-------|
| L1CS-1A        |                            |                            |                         |       |
| CS_402         | TACTCCCTTCCATCTTGCATTT     | CAGGTTTGTTCCTTCAAGATTAACA  |                         | 55    |
| CS_472         | GACCAAGGTATTTCTGCTCCTG     | TGAGAAAGGAGCTTGGGAGATA     |                         | 60    |
| CS_957         | GGCAAGGACTTTTAGAGCACAG     | CTGCAAGTGTCCACCAGAGTTA     |                         | 60    |
| CS_143         | TAAATCCCAGCCACTGATTTTT     | TGCTTGTGGTCATATGAGTCC      |                         | 55    |
| CS_1099        | TCAGTAGACCCCAATTTGAAGC     | AAGAACCATCCTTGTGGATTTG     | CTGCACAGCAAAGAACTACC    | 60    |
| CS_932         | CCACAAAACCTGCAATATCCAAA    | GAATAGATACATGTGTCAAGATCCA  | TTTTACTGTGGTGGGACTG     | 60    |
| L1CS-1B        |                            |                            |                         |       |
| CS_339         | ATGTTCTTTTCATGGCAGACAG     | TCAAAGGCAATAATCACTTCACC    |                         | 60    |
| CS_399         | TCACAGTAAGCTAAAGCAATCACA   | CGTTCAAAGGACCTGGATATAGA    |                         | 60    |
| CS_1085        | CCCTTGCACTTAGCAATTACCT     | TTGCTCAGTAAATGAAGGTGAAATA  | TGCCTGTTCACTCTGATGGTAT  | 57/60 |
| CS_421         | GAAGGCAGATAAGGGGATTGAG     | GGCATGTCTCATTTACATTCTCA    |                         | 60    |
| CS_653         | AGTCCTACAGCCCAAACCTGC      | GTCACTTCAGGCACTCTTTCT      |                         | 60    |
| CS_440         | TCAACAAGTAGGAGGTGAATCG     | CCTTTTGCGATTTCTTCAACTC     |                         | 55    |
| L1CS-2 lineage |                            |                            |                         |       |
| CS_834         | TTTGGCTGAAGTCATTTCTACAAG   | CCTGTCTTTAACCTTGCCTAACA    | CAGTAACCAAACAGCATGGTACT | 60    |
| CS_272         | ATACTGCAAATGCTCAACAACG     | ATGATGGTGACATTGACTGAGG     | CTGTTGGTGGGACTGTCAACTA  | 60    |
| CS_848         | TGTGAAAGATTTAGTAGCTTGAGAAC | CATGTATGTCAATATAGCAACTACCA | GTTTGATCTCAGACTGCTGTGC  | 55    |
| CS_709         | TGGACATCTTTTGGAGGGTTT      | ATAGGTTTGTGGGATTGTTGCT     |                         | 55    |

\* F+I: Forward primer and Internal primer, I+R: Internal primer and Reverse primer

### C) Full-length CS L1 primers

| Name            | Forward primer            | Reverse primer             | A.T. (°C) |
|-----------------|---------------------------|----------------------------|-----------|
| L1.56 L1PA2-1E  | AAGGAACAGTCAGCAGAATAAACAG | GATGTAGGCAGTAACTTGGTAGGG   | 60        |
| L1.304 L1CS-1B  | TGAGGCAACAGAGCTAAGAAATCTA | CCTGTCTAATCAACTACAAGAGGTCA | 60        |
| L1.509 L1CS-1B  | CTGGAAATCAAATTCTTCTCTCTCC | CACCTTTGACTGATCTTTAGGGTTA  | 60        |
| L1.790 L1PA2-1E | CCTTTTAAGAGCCAGGACAGAATA  | CTTCAAGGTAATGGCATAGTCAAC   | 60        |
| L1.848 L1CS-2B  | GATGTTTGGGAAACATATAgCTGTG | TATTGACCTATGGAGGCCATTTAG   | 60        |

| <b>L1 (-)</b> | <b>L1 (+)</b> | <b>Primer pair*</b> |
|---------------|---------------|---------------------|
| 403           | 489           | F+I                 |
| 356           | 494           | F+I                 |
| 107           | 835           |                     |
| 162           | 448           | F+I                 |
| 178           | 415           | F+I                 |
| 1342          | 388           |                     |
| 184           | 641           |                     |
| 335           | 395           | F+I                 |
| 269           | 968           |                     |
| 191           | 497           |                     |
| 508           | 1004          |                     |
| 772           | 883           |                     |
| 220           | 173           | F+I                 |
| 515           | 480           | F+I                 |
| 201           | 461           |                     |
| 706           | 449           | F+I                 |
| 167           | 499           |                     |
| 398           | 358           |                     |
| 382           | 500           |                     |
| 240           | 1090          |                     |
| 224           | 188           |                     |
| 204           | 876           |                     |
| 879           | 880           |                     |
| 2249          | 154           |                     |
| 162           | 213           |                     |
| 870           | 919           | I+R                 |
| 242           | 509           |                     |
| 194           | 745           |                     |
| 454           | 145           | F+I                 |
| 167           | 296           |                     |
| 196           | 1056          |                     |



|            |      |     |
|------------|------|-----|
| 134        | 1108 |     |
| 177        | 2617 |     |
| 215        | 547  | F+I |
| <b>631</b> | 1585 |     |
| 630        | 716  | F+I |
| 471        | 701  | F+I |
| 156        | 2167 |     |
| 168        | 578  | F+I |
| 999        | 1952 |     |

|      |      |     |
|------|------|-----|
| 272  | 1565 |     |
| 541  | 1958 |     |
| 204  | 638  | F+I |
| 163  | 330  | F+I |
| 154  | 2249 |     |
| 433  | 298  | F+I |
| 257  | 1364 |     |
| 196  | 529  | F+I |
| 357  | 637  | F+I |
| 1324 | 720  | I+R |

|     |      |     |
|-----|------|-----|
| 200 | 1103 |     |
| 154 | 395  | F+I |
| 314 | 570  | F+I |
| 115 | 767  | F+I |
| 169 | 1328 |     |
| 686 | 1661 |     |
| 283 | 392  | F+I |
| 207 | 487  | F+I |
| 198 | 1593 |     |
| 211 | 1452 |     |

|     |      |     |
|-----|------|-----|
| 167 | 2102 |     |
| 177 | 425  | F+I |
| 195 | 1677 |     |
| 148 | 1535 |     |

|     |      |     |
|-----|------|-----|
| 473 | 1596 |     |
| 193 | 1542 |     |
| 158 | 1554 |     |
| 120 | 168  | F+I |
| 225 | 529  | F+I |
| 186 | 401  | F+I |
| 214 | 403  | F+I |
| 202 | 286  | F+I |
| 229 | 398  | F+I |
| 366 | 548  | F+I |
| 208 | 648  | F+I |
| 211 | 596  | F+I |
| 164 | 2080 |     |
| 273 | 1287 |     |
| 174 | 1770 |     |
| 188 | 475  | F+I |
| 192 | 1181 |     |
| 118 | 620  | F+I |
| 193 | 371  | F+I |
| 350 | 486  | F+I |
| 187 | 1582 |     |
| 130 | 1430 |     |
| 792 | 1995 |     |
| 248 | 3038 |     |
| 366 | 461  | F+I |
| 276 | 1505 |     |
| 141 | 516  | F+I |
| 149 | 1288 |     |
| 164 | 1352 |     |
| 388 | 1342 |     |
| 380 | 1395 |     |

|     |      |     |
|-----|------|-----|
| 167 | 1539 |     |
| 280 | 474  | F+I |
| 152 | 627  | F+I |
| 294 | 619  | F+I |
| 133 | 552  | F+I |
| 494 | 424  | F+I |
| 114 | 573  | F+I |

|      |      |     |
|------|------|-----|
| 124  | 459  | F+I |
| 329  | 385  | F+I |
| 940  | 988  | F+I |
| 1034 | 1114 | F+I |
| 155  | 546  | F+I |
| 587  | 1546 |     |

|     |      |     |
|-----|------|-----|
| 105 | 2059 |     |
| 275 | 1445 |     |
| 239 | 488  | F+I |
| 131 | 595  | F+I |
| 816 | 2173 |     |

| L1 (-) | L1 (+) | Primer pair* |
|--------|--------|--------------|
| 173    | 401    |              |
| 299    | 458    |              |
| 147    | 158    | F+I          |
| 670    | 984    |              |
| 296    | 732    |              |
| 153    | 488    |              |
| 169    | 675    |              |
| 276    | 580    |              |
| 342    | 797    |              |
| 183    | 458    |              |
| 423    | 943    |              |
| 393    | 238    | F+I          |

|             |      |     |
|-------------|------|-----|
| 404         | 795  |     |
| 179         | 354  | F+I |
| 342         | 467  |     |
| 209         | 575  |     |
| 230         | 245  | I+R |
| 184         | 329  |     |
| 796         | 909  |     |
| 381         | 582  |     |
| 168         | 157  | F+I |
| 146         | 827  |     |
| 160         | 547  |     |
| 540         | 972  |     |
| 167         | 209  | F+I |
| 159         | 209  | F+I |
| 183         | 717  |     |
| 98          | 533  | I+R |
| 533         | 497  | F+I |
| 143         | 584  |     |
| 157         | 230  | F+I |
| <hr/> <hr/> |      |     |
| 649         | 764  | F+I |
| 178         | 1167 |     |
| 446         | 1389 |     |
| 1748        | 1044 | F+I |
| 161         | 2483 |     |
| 151         | 1542 |     |
| 445         | 705  | F+I |
| 213         | 629  | I+R |
| 117         | 1502 |     |
| 224         | 508  | F+I |
| 137         | 1891 |     |
| 184         | 1512 |     |
| 220         | 517  | F+I |

|     |      |     |
|-----|------|-----|
| 116 | 1655 |     |
| 103 | 1522 |     |
| 167 | 1706 |     |
| 283 | 626  | F+I |
| 147 | 255  | I+R |
| 200 | 1166 |     |

|     |      |     |
|-----|------|-----|
| 91  | 293  | F+I |
| 105 | 510  | F+I |
| 253 | 453  | F+I |
| 212 | 468  | F+I |
| 482 | 545  | F+I |
| 121 | 1294 |     |
| 179 | 1138 |     |
| 176 | 2577 |     |
| 120 | 1954 |     |
| 748 | 2675 |     |
| 223 | 1232 |     |

|     |      |     |
|-----|------|-----|
| 268 | 278  | F+I |
| 277 | 482  | F+I |
| 280 | 1415 |     |
| 179 | 354  | F+I |

|      |      |     |
|------|------|-----|
| 136  | 1234 |     |
| 316  | 612  |     |
| 282  | 1288 |     |
| 222  | 1393 |     |
| 1333 | 2411 |     |
| 169  | 1296 |     |
| 455  | 240  | F+I |
| 189  | 1282 |     |
| 321  | 229  | F+I |
| 634  | 225  | F+I |

|         |         |     |
|---------|---------|-----|
| 671     | 1956    |     |
| 236     | 1167    |     |
| 185     | 1921    |     |
| 121     | 1562    |     |
| 188     | 302     | F+I |
| 766     | 459     | F+I |
| 160     | 1543    |     |
| 295     | 2150    |     |
| 222/367 | 636/491 | F+I |
| 679     | 1732    |     |
| 437     | 1579    |     |
| 207     | 1356    |     |
| 208     | 501     | F+I |
| 164     | 389     | F+I |
| 232     | 449     | F+I |
| 166     | 2169    |     |

| <b>L1 (-)</b> | <b>L1 (+)</b> |
|---------------|---------------|
| 1168          | 7224          |
| 884           | 6966          |
| 413           | 6781          |
| 672           | 6709          |
| 141           | 6172          |
