# Supplementary material
Source: PubMed Central journal article supplement (PMC1847406)
Supplement: NIHMS19409-supplement-SuppTable2.pdf [file NIHMS19409-supplement-SuppTable2.pdf]

**Supplemental Table 2. Full-length L1 sequencing primers.**

| #  | Name     | Sequencing primer (5' -> 3') | Position  | Reference     |
|----|----------|------------------------------|-----------|---------------|
| 1  | L1-16F   | ATGGCCGAATAGGAACAGCT         | 16-35     | This study    |
| 2  | L1-540R  | TACAGAGGCAGGCAGGCCT          | 522-540   | This study    |
| 3  | L1-599F  | AGACTTAAGTGTCCCTGTCT         | 597-616   | Seleme et al. |
| 4  | L1-783R  | CTCAGCTGCAGGTCTGTT           | 785-802   | This study    |
| 5  | L1-1065F | AACTCTAAAACGCAGAGCGC         | 940-959   | Seleme et al. |
| 6  | L1-1335F | TGAGCAAAGCCTCCAAGAAATA       | 1335-1356 | This study    |
| 7  | L1-1400R | GGTACACCAATCAGACGTAGAT       | 1379-1400 | This study    |
| 8  | L1-1802F | AACCCCTACAAGCCAGAAGAG        | 1677-1696 | Seleme et al. |
| 9  | L1-1960R | AGTTGATGCAGTTTCTTCTAGTC      | 1937-1960 | This study    |
| 10 | L1-2386F | GAGACAAAAGAAGGCCATTAC        | 2261-2280 | Seleme et al. |
| 11 | L1-2542R | GGAGAGTTCTGTAGATGTCTATTA     | 2519-2542 | This study    |
| 12 | L1-2936F | CTTTGAAACCAACGAGAACA         | 2808-2827 | Seleme et al. |
| 13 | L1-2951R | AATTGTGATGTTAGGGTGTCAA       | 2930-2951 | This study    |
| 14 | L1_3279F | TACATTCCTCGACACCTACACT       | 3279-3300 | This study    |
| 15 | L1-3541R | GTATCAGAATGATGCTGGCCTC       | 3520-3541 | This study    |
| 16 | L1-3535F | TGGATTACAGCCGAATTCT          | 3411-3430 | Seleme et al. |
| 17 | L1-3899F | CCACAGCCAATATCATACTGAATG     | 3899-3922 | This study    |
| 18 | L1-4182R | GTATCCTGAGACTTTGCTGAAG       | 4161-4182 | This study    |
| 19 | L1-4686F | GCCAAGTCAATCCTAAGCCA         | 4558-4577 | Seleme et al. |
| 20 | L1-4799R | TCTGTTTTGGTACCAGTACC         | 4653-4672 | Seleme et al. |
| 21 | L1-4806F | CTGGCTAGCCATATGTAGAA         | 4806-4825 | This study    |
| 22 | L1-5152R | TGTAGATTCTGGATATTAGCCC       | 5131-5152 | This study    |
| 23 | L1-5474R | CTGAGGAATCGCCACACTGA         | 5455-5474 | This study    |
| 24 | L1-5609F | GCGATTCCTCAGGGATCTAG         | 5463-5782 | Seleme et al. |
| 25 | L1-5798F | CACTCATAGGTGGGAATTGAACA      | 5798-5820 | This study    |
| 26 | L1-5885R | ACTGAGAATGATGGTTTCCA         | 5757-5738 | Seleme et al. |
